# Supplementary material for: Hydrogen bonding and dominant conformations of hydrated sugar analogue complexes using tetrahydrofurfuryl alcohol as the model sugar molecule
Source: Royal Society of Chemistry journal article supplement (doi:10.1039/c7cp07935d), 2018-01-01
Supplement: c7cp07935d1.pdf [file c7cp07935d1.pdf]

## Hydrogen Bonding and Dominant Conformation of Hydrated Sugar

### Analogue Complexes: Tetrahydrofurfuryl Alcohol as the Example

Shan Jin,<sup>a</sup> Yongjun Hu,<sup>\*a</sup> Pengchao Wang,<sup>a</sup> Huaqi Zhan,<sup>a</sup> Qiao Lu,<sup>a</sup> Fuyi Liu,<sup>b</sup> and Liusi Sheng<sup>\*b</sup>

#### Supporting Information

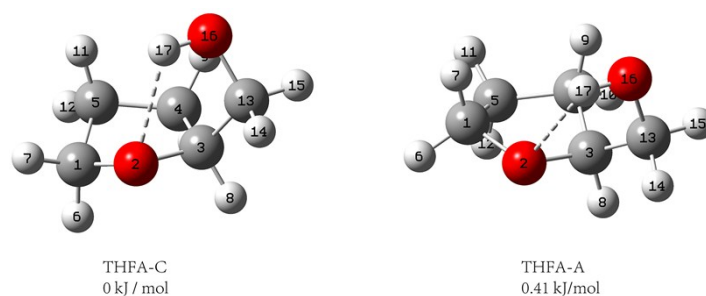

**Fig. S1** The most abundant conformer of monomer THFA. The envelope structure is named as Conformer THFA-C, and the twisted structure is named as Conformer THFA-A.

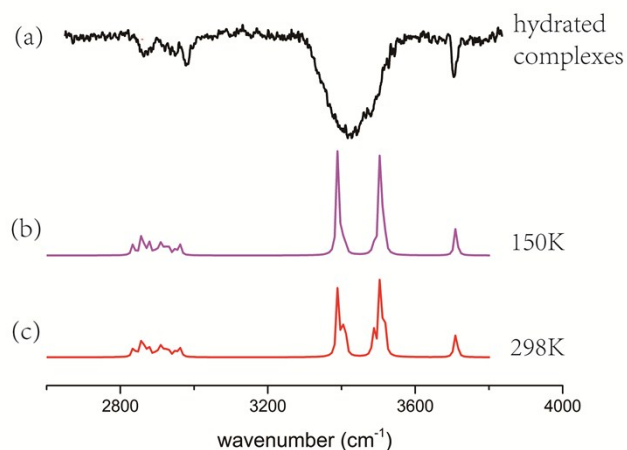

**Fig. S2** Computed IR spectra of the most abundant conformer of hydrated THFA complexes at two different temperatures with the experimental results for comparison. A Lorentzian profile with a FWHM of 20  $\text{cm}^{-1}$  is used to convolute the calculated spectra.

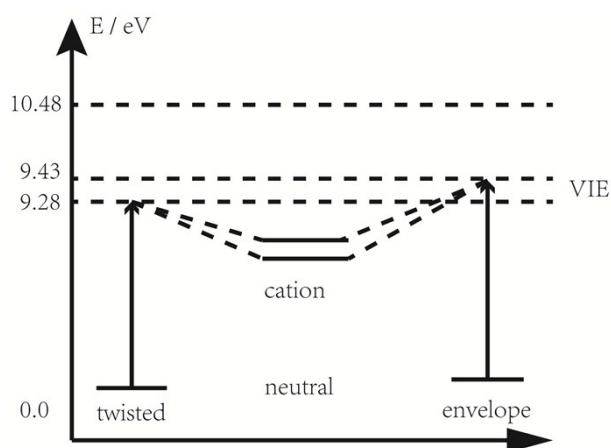

**Fig. S3** Energy diagram of the VUV one-photon ionization of hydrated THFA from the neutral ground state. The stable structures and transition states of the cation were searched at mp2/aug-cc-pVTZ level of theory.

**Table S1** The parameters of the neutral and cationic hydrated THFA complexes. (pm)

| conformer | A-I   | A-II  | C-I   | trans-hc | cis-hc |
|-----------|-------|-------|-------|----------|--------|
| O2-H19    | 181.7 | 184.2 | 181.2 |          |        |
| C3-C13    | 140.1 | 140.3 | 140.2 | 130.5    | 130.1  |
| O16-H17   | 96.7  | 96.7  | 96.7  | 99.6     | 99.4   |
| H17-O18   | 190.6 | 191.7 | 190.7 | 162.2    | 163.6  |
